# 1 **Factors affecting oral health problems among school children in Kaski District, Nepal**

2

## 3 **Authors**

4 <sup>1</sup>Kamal Prasad Chapain, <sup>2</sup>Krishna Gopal Rampal, <sup>1</sup>Kalpana Gaulee Pokhrel, <sup>1</sup>Chiranjivi  
5 Adhikari, <sup>1</sup>Deependra Hamal, <sup>1</sup>Khem Narayan Pokhrel

6

## 7 **Author affiliations**

8 1. Development and Research International Nepal, Kathmandu, Nepal.

9 2. Department of Medical Science, The University of Cyberjaya, Malaysia

10

## 11 **Author email addresses**

12 Kamal Prasad Chapain cpnkamal@gmail.com

13 Krishna Gopal Rampal drkgrampal@cyberjaya.edu.my

14 Kalpana Gaulee Pokhrel kalpananepalikit@gmail.com

15 Chiranjivi Adhikari chiranadhikari@gmail.com

16 Deependra Hamal hmldipendra@yahoo.com

17 \*Khem Narayan Pokhrel pokhrelkhemn@gmail.com

18

## 19 **\*Corresponding Author**

20 Khem Narayan Pokhrel, MA, MSc, PhD (Global Health)

21 Development and Research International, Nepal.

22 Khumaltar, Lalitpur

23 Email:pokhrelkhemn@gmail.com

24

25 Word Count: Abstract (299); Main Text (2800)

## 1 **Abstract**

## 2 **Introduction**

3 School children have a high prevalence of oral health problems in Nepal. Socio-demographic  
4 factors such as gender, parents' socioeconomic status, and individual awareness of oral health  
5 may have an influence on the occurrence of oral health problems. However, little evidence is  
6 available about the oral health problems and their associated factors among school children.  
7 Therefore, this study aimed to assess the factors associated with oral health problems among  
8 school children in Nepal.

## 9 **Methodology**

10 A cross-sectional study was conducted among school children of grade 7 in 12 schools of  
11 Kaski district, Gandaki Province, Nepal. The schools were randomly chosen from urban and  
12 semi-urban areas in the district. A total of 669 students participated in the study. Data were  
13 collected using a set of questionnaires covering dental health knowledge, socio-demographic  
14 characteristics, oral health condition and practices. The factors of poor oral health condition  
15 and practices were examined using t-test, one-way Anova, and multiple linear regression.

## 16 **Results**

17 School children who visited health institutions for oral health services and those with parents  
18 having higher level education had higher dental health knowledge scores. Total decayed  
19 score was higher among those who did not have knowledge that fluoride prevents decay  
20 compared to those who had knowledge about it (Have knowledge about fluoride prevents  
21 decay: Mean=1.21 (SD=1.54) Vs No knowledge: mean=2.13 (SD=2.13). Females were more  
22 likely to have higher DMFT score compared to males ( $\beta$ - coefficient=0.43, 95% CI=0.13,  
23 0.73, P value=0.005) and increase in knowledge score was associated a with a decrease in  
24 DMFT score ( $\beta$ - coefficient=-0.09, 95% CI= -0.20, -0.10, P value=0.047).

1 **Conclusion**

2 This study found that gender, knowledge score, and parent’s socioeconomic status were the  
3 major factors contributing to higher DMFT scores. School children should be provided with  
4 regular oral health counseling and promotion activities in schools and oral health screening in  
5 schools.

6 **Keywords:** School children; dental caries; oral health; dental health knowledge score.

7

8

9

10

11

12

13

14

15

16

17

18

19

20

21

22

23

24

## 1 **Introduction**

2 Oral health problems are common among school children. An estimated 60-90% of school  
3 children suffer from dental caries worldwide (WHO, 2016). Dental caries is the most  
4 prevalent condition included in the 2016 Global Burden of Disease Study, ranking first for  
5 the decay of permanent teeth (2.3 billion people) and 12th for deciduous teeth (560 million  
6 children). It has been found that children suffering from oral disease are 12 times more likely  
7 to be restricted in daily activities than normal children who don't have any oral disease (1)  
8 Oral diseases are usually multifactorial. Socioeconomic factors affect the severity and the  
9 distribution of oral diseases. Family environment including socio-behavioural and  
10 environmental factors have a strong relationship with the oral health condition of children.  
11 Moghaddam et al., showed that children's poor oral health condition is related to lower  
12 education level of their mother and father and with lower family income (2). Children of  
13 parents who have lower education level and lower level of socio-economic status are more  
14 affected by dental caries and other oral health related problems (3).

15 To promote oral health education, a supportive environment should be provided to the  
16 community as well as school children and policy makers should plan in such a way by which  
17 social discrimination can be reduced(4). Healthy oral health behavior minimizes the risk of  
18 various oral health problems. Brushing twice a day with fluoride toothpaste is one of the most  
19 important habits for good oral health. Through brushing during the day and night after meal,  
20 children can learn about the benefits of good oral hygiene and are to be taught to brush their  
21 teeth twice daily with fluoride toothpaste (5).

22 Healthy oral health practice is one of the factors to prevent oral health problems. A study in  
23 Nepal shows almost 95 % school children reported cleaning their teeth at least once a day and  
24 71% only used fluoridated tooth-paste. In this study it was found that during the last 6 months  
25 only 4% of them received service from oral health services (Thapa et al.,). Due to the low

1 level of awareness, oral health education and oral hygiene practice, promotion for prevention  
2 is essential. Dental treatment is also highly expensive and difficult to be afforded by most of  
3 the people with low socioeconomic background. Although dental caries is a highly  
4 preventable disease, a high proportion of the people in Nepal who are poor and marginalized  
5 are suffering from oral health related problems. Poor oral hygiene is regarded as one of the  
6 most important risk factors for common oral diseases. The most common cause of  
7 deteriorating oral health conditions of Nepalese people are changes in dietary habit.

8 Many school children suffer from oral health problems in Nepal. A total of 58% of  
9 schoolchildren aged between 5-6 years were affected by dental caries according to report by  
10 the National Pathfinder Survey, 2004. Another study found that oral health related problems  
11 was the prime reason of missing school in Nepal where 32% of the students missed their  
12 school due to dental pain (6).

13 Very few studies have examined the association between oral health and oral hygiene  
14 practices with sociodemographic factors. Although there are a few studies in Nepal which  
15 describe the socio-economic factors and oral health practices among school children that are  
16 contributing to oral health problems, the knowledge level of school students, practices in  
17 terms of using fluoridated toothpaste and knowledge about teeth and gums is not well known.  
18 Therefore, this study aimed to assess these factors associated with oral health problems  
19 among school children in Nepal.

## 20 **Methods**

### 21 *Study design and setting*

22 A cross sectional study was conducted among school children in Grade 7 in 12 community  
23 schools in the Kaski district of Nepal. Kaski district is the provincial capital of Gandaki  
24 Province in Western Nepal. The schools were located in urban and semi-urban areas of the

1 district. We purposively selected Kaski district as the study district because Kaski district is  
2 the provincial headquarters, where people with diverse population from more than 15 districts  
3 of its catchment area live.

#### 4 ***Sampling strategy and sample size***

5 We randomly selected 12 government schools out 325 schools. All children in Grade 7 of the  
6 selected schools were included in the study. We presumed the prevalence of dental caries is  
7 60% among school children in calculating the estimated sample size considering 95%  
8 confidence and 80% power of the study. The estimated sample size was 654 and we  
9 increased the sample size to 669 in this study considering various characteristics to be  
10 studied.

#### 11 ***Participant's inclusion and exclusion criteria***

12 Those school children, who were enrolled in their school at least 6 months before the study  
13 in grade 7 were included. Those, who were not able to respond the questions because of their  
14 intellectual disability were excluded from the study.

#### 15 ***Study tools and measurements***

##### 16 ***Sociodemographic characteristics, oral health knowledge, and practices***

17 Information on students' sociodemographic characteristics, visiting dentist or dental care  
18 practitioners for their services, student's knowledge on oral health, oral health practice and oral  
19 health seeking behavior were elicited using a set of questionnaires.

20

21 Student's oral health knowledge was scored using a system adopted from previous studies (7,8)

22 Oral health knowledge was determined by asking the following questions (1) periodontal  
23 disease can affect health, (2) regular tooth brush can protect tooth decay, (3) fizzy soft drinks  
24 affect the teeth, (4) use of fluorides prevent tooth decay, (5) gingivitis is a disease that makes  
25 your gums bleed, (6) causes of dental caries or proper tooth brushing can prevent dental caries

1 (7) sugar causes tooth decay, (8) tooth decay is a disease that destroys your teeth, and (9)  
2 healthy teeth means strong and carries free teeth. Oral health practices were determined by  
3 asking the following questions: (1) frequency of brushing teeth, per day, (2) time spent for  
4 brushing in minute, (3) cleansing aid used, (4) materials used to clean teeth, (5) frequency of  
5 changing tooth brush, (6) type of toothpaste used, (7) mouth rinsing after eating, (8) clean  
6 tongue after meal or during rushing.

7

### 8 ***Oral Health Condition (DMFT score)***

9 Oral health condition of the student was assessed and expressed using the Total DMFT Index  
10 Score and Total Decayed Score. The DMFT score numerically expresses the prevalence of  
11 dental caries and is obtained by calculating the number of Decayed (D), Missing (M) and  
12 Filled (F) teeth (T). It is used to get an estimate how much the dentition until the day of  
13 examination has become affected. It is calculated for 28 (permanent) teeth, excluding third  
14 molar (wisdom teeth). Oral examination is carried out to determine: How many teeth have  
15 caries lesions (incipient caries not included), how many teeth have been extracted and how  
16 many teeth have fillings or crowns. A total score of DMFT is 28. (The Third edition of "Oral  
17 Health Surveys - Basic methods", Geneva 1987).

18

19

20

### 21 ***Data collection***

1 Oral health condition was examined by the researcher and two research assistants collected  
2 the information from school children from April to May 2020. Prior to data collection the  
3 research assistants were given three days training covering data collection and ethical  
4 procedures. Pre-testing of questionnaires were done in non-selected schools and necessary  
5 modifications in questionnaires were made.

## 6 ***Data analysis***

7 Statistical analysis was conducted to examine the association between factors and dental  
8 health condition, knowledge, and practices of school children. Multivariate analysis was  
9 conducted to determine the factors associated with DMFT scores after controlling for  
10 sociodemographic variables. We used SPSS version 20 for the entire data analysis process.

## 11 ***Ethical consideration***

12 Ethical approval was obtained from the Nepal Health Research Council (ERB Protocol  
13 Registration No. 165/2021PhD) and the University of Cyberjaya (UOC) Research Ethics  
14 Committee (CRERC Reference no UOC/CRERC/EXTERNAL/07/2020 -SPC620200605).  
15 Signed consent from the participants and assent from the head teacher of the school were  
16 obtained. Participation was ensured to be completely voluntarily and confidential.

17

## 18 **Results**

19 ***Descriptive characteristics on the sociodemographic characteristics, oral health***  
20 ***knowledge, oral health practice and oral health condition of school children***



1 Of total participants (n=669), 54.9% were females, and 67.1% had used health services for  
2 oral health. More than half (52.6%) had practiced brushing teeth two times a day and nearly  
3 half (49.3%) reporting brushing for 2-3 minutes. Regarding use of fluoridated toothpaste,  
4 only 29.1% used fluoridated toothpaste. About 59.3% participants had decayed teeth and 3%  
5 had filled teeth. Their average knowledge scores on oral health was 7.06 (1.46) and mean  
6 DMFT score was 1.82 (1.07) (Table 1)

### 7 ***Total Knowledge score, DMFT score and Total Decayed score by sociodemographic*** 8 ***factors***

9 Total DMFT score was significantly higher among females compared to males (Male:  
10 Mean=1.47 (SD=1.78) Vs female: mean=1.90 (SD=1.95); p=0.003). Similarly total decayed  
11 score was also higher among females compared to males (Male: Mean=1.24 (SD=1.53) Vs  
12 female: mean=1.62 (SD=1.75); p=0.003). Knowledge score was also higher among females  
13 compared to male (Male: Mean=6.86 (SD=1.62) Vs female: mean=7.25 (SD=1.27);  
14 p<0.001).

15 Those who did not visit hospitals had lower DMFT scores compared to those who visited  
16 hospitals (Hospital visit: Mean=1.99 (SD=1.99) Vs No hospital visit: mean=1.57 (SD=1.82);  
17 p=0.007). The knowledge level was lower among those who did not visit hospitals (Hospital  
18 visit: Mean=7.25 (SD=1.22) Vs No Hospital Visit: mean=6.97 (SD=1.55); p=0.018).

19  
20 Knowledge level was higher among the children whose fathers had education level high  
21 school and above as compared to those whose parents were illiterate. (Father's education high  
22 school and above: Mean=7.20 (SD=1.30) Vs illiterate: mean=6.62 (SD=1.95). (Table 2)

23

### 24 ***Knowledge on oral health and DMFT score and Decayed score***

1 Total decayed score was higher among those who did not have knowledge that fluoride  
2 prevents decay compared to those who had knowledge about it. (Knowledge about fluoride  
3 prevents decay: Mean=1.21 (SD=1.54) Vs No knowledge: mean=2.13 (SD=2.13). Those who  
4 do not have knowledge that gum diseases affect teeth had higher decayed score compared to  
5 those who had knowledge. (Knowledge about gum disease affects teeth Mean=1.37  
6 (SD=1.59) Vs No knowledge: mean=2.30 (SD=2.02). (Table 3)

7

### 8 **Practice on oral health on DMFT score, Decayed score and total knowledge score (P-** 9 **value by ANOVA)**

10 Those who brushed their teeth two times a day had a higher knowledge score compared to  
11 those who brushed sometimes, once daily, two times a day, and more than two times a day.  
12 (Brushing twice a day Mean=7.22 (SD=1.34) Vs more sometimes: mean=6.76(SD=2.00).

13 Those who used fluoridated toothpaste had higher knowledge score compared to those who  
14 did not use fluoridated toothpaste (Fluoridated toothpaste=7.58 (SD=1.32) Vs non fluoridated  
15 toothpaste: mean=7.03 (SD=1.62).

16 School children who had the practice of mouth gargling always had higher knowledge scores  
17 compared to those who never practiced. (Mouth gargled always =7.13 (SD=1.39) Vs Never:  
18 mean=6.27(SD=2.07); p=0.002). Those school children who cleaned their tongue always had  
19 higher knowledge scores compared to those who never cleaned their tongue (Tongue cleaned  
20 always=7.19 (SD=1.40) Vs never cleaned tongue: mean=6.57 (SD=1.53). (Table 4).

21

### 22 **Association of socio-economic characteristics, knowledge and practices with total** 23 **DMFT scores**

24 A multiple linear regression model with gender, education level of father, education level of  
25 mother, occupation of father, occupation of mother, previous exposure to oral health

1 education, knowledge score, availability of water, regular brushing habit, mouth gargle after  
2 meal, and tongue cleaning after meal as independent variables was developed. The  
3 independent variables that were found to be significantly associated with DMFT are gender  
4 and total knowledge score. Females are more likely to have higher DMFT score compared to  
5 male ( $\beta$ - coefficient=0.43, 95% CI=0.13, 0.73, P value=0.005) and increase in knowledge  
6 score is associated a with a decrease in DMFT score ( $\beta$ - coefficient=-0.09, 95% CI= -0.20, -  
7 0.10, P value=0.047). (Table 5).

8

## 9 **Discussion**

10 Descriptive analysis showed that the school children who visited health institutions for oral  
11 health services were found to have higher knowledge score. Moreover, their parents also had  
12 higher level of education. Children who visited health institutions for services also were  
13 found to have higher DMFT scores. School children who had knowledge about fluoride in  
14 toothpaste had lower DMFT scores compared to those who did not. Descriptive analysis also  
15 showed that the total knowledge score was higher among those who brushed properly, who  
16 used fluoridated toothpaste, and who gargled their mouth and cleaned their tongue.  
17 Children's knowledge score on oral health was dependent on father's education level. Parents  
18 might have given more attention to their children about oral health and sought more oral  
19 health services, thus improving their knowledge score (9). Our findings was supported by  
20 different studies conducted among school children which has shown their parents' education  
21 level was directly related to students higher knowledge scores on oral health (10,11), In  
22 addition, our results were similar with the findings of the study conducted among school  
23 children in Nepal (12). We also found that children who visited health institution for oral  
24 health services had higher DMFT score. Similarly high decayed score was found among the  
25 school children who visited for dental services in China (13). Visiting oral health services

1 with high DMFT score and decayed score may indicate that most of the dental visits are due  
2 discomfort and pain rather than regular visits (14).

3 Multivariate analysis shows that the school children who were female and those who had a  
4 lower knowledge score were more likely to have higher DMFT scores. Adolescent girls have  
5 been given low priority for health and education in children and the gender disparity remains  
6 highly prevalent in Nepali society (15). World Health Organization (WHO) has shown that  
7 adolescent girl's health needs were higher and they had limited information and resources of  
8 health promotion activities(16). A study conducted in India also showed higher mean DMFT  
9 scores in female students compared with male students (17,18). Similar results were found in  
10 a study conducted in Qatar in 2014(19). Higher mean DMFT scores were also found in  
11 females compared to males (11). Our results were also supported by various studies  
12 conducted in South Asian countries such as India, Nepal, Bangladesh, and Sri Lanka (15).  
13 However, our results are different from the study conducted on DMFT scores among  
14 adolescents in the United Kingdom which had shown that there was no disparity among  
15 adolescents by gender in terms of their DMFT scores (20).

16 This study also found that decayed score was also higher among females as compared to  
17 males. A similar result was found in the study on Iranian school children (21).

18 Knowledge about the need of using fluoridated toothpaste was negatively associated with  
19 DMFT scores among children. Children with lower knowledge score on using fluoridated  
20 toothpaste might have limited use of fluoridated toothpaste leading to higher DMFT scores.  
21 Similar result was seen in a study conducted in Mangalore City of India (22). In addition, a  
22 study conducted in a rural village in Nepal among Chepang children had also shown that a  
23 high number of children did not have knowledge on fluoridated toothpaste and its importance  
24 to prevent dental caries (12).

1 Children's proper oral hygiene practices such as proper brushing, use of fluoridated  
2 toothpaste, and gargling leads to improved oral health knowledge scores. Oral health  
3 knowledge among children had influenced improved proper brushing habit and frequency in  
4 a study conducted in China (13). In addition, this study also reported that knowledge had a  
5 role in improving oral health practices such as gargling and cleaning the tongue. Another  
6 study showed that children with a habit of proper teeth brushing frequency with fluoride  
7 containing toothpaste had a higher knowledge on oral health and lower DMFT score(23).  
8 Our study also showed that students with higher knowledge score, who gargled their mouth  
9 and cleaned the tongue had lower DMFT score. This finding is supported by a study  
10 conducted in Ethiopia in 2021(24).

11 This study is the first study to measure DMFT index and oral health condition and its  
12 associated factors among school children in the Gandaki Province, Nepal. The findings on  
13 associated factors in this study is based on the reported responses in the questionnaire filled  
14 by school children. A limitation may have been that this may pose some social desirability  
15 bias and school children may have reported good knowledge and practices. To minimize this  
16 bias, the researcher himself and his research assistants attended the session before filling  
17 questionnaires and briefed the school children on all questions that were to be filled out.  
18 Further, researcher himself as a dental surgeon checked up their dental condition to measure  
19 DMFT index. The second limitation was to select the community schools in urban area and  
20 peri-urban area of a district in Gandaki Province and findings may not be appropriate to  
21 generalize in other settings in Nepal. However, the socioeconomic status of the parents and  
22 settings in Nepal are somehow similar to our study settings. That is why this study can be  
23 generalized in similar settings in Nepal.

24 In conclusion, this study found that gender, total knowledge score and parent's  
25 socioeconomic status were the major factors contributing to higher DMFT scores and

1 Decayed score. To improve the oral health condition of the school children, school children  
2 should be provided with tailor made training by school teachers and regular oral health  
3 screening be conducted.

4

#### 5 **Acknowledgements**

6 The study team would like to acknowledge the ethical review committee and teaching  
7 faculties of University of Cyberjaya, PhD Centre Nepal and the students who participated in  
8 the schools. We also would like to acknowledge the authorities in the government schools.

9 **Author's information** <sup>1</sup>Kamal Prasad Chapain, <sup>2</sup>Krishna Gopal Rampal, <sup>1</sup>Kalpana Gaulee  
10 Pokhrel, <sup>1</sup>Chiranjivi Adhikari, <sup>1</sup>Deependra Hamal, <sup>3</sup>Khem Narayan Pokhrel

11

12 **Conceptualization:** Kamal Prasad Chapain, Krishna Gopal Rampal, Khem Narayan Pokhrel

13 **Data curation:** Kamal Prasad Chapain, Kalpana Gaulee Pokhrel, Chiranjivi Adhikari, Khem  
14 Narayan Pokhrel

15 **Formal analysis:** Kamal Prasad Chapain, Krishna Gopal Rampal, Khem Narayan Pokhrel

16 **Supervision:** Krishna Gopal Rampal, Khem Narayan Pokhrel

17 **Validation:** Kamal Prasad Chapain, Krishna Gopal Rampal, Khem Narayan Pokhrel

18 **Manuscript preparation and finalization:** Kamal Prasad Chapain, Krishna Gopal Rampal,  
19 Khem Narayan Pokhrel

20 **Manuscript – review & editing:** Kamal Prasad Chapain, Krishna Gopal Rampal, Kalpana  
21 Gaulee Pokhrel, Chiranjivi Adhikari, Deependra Hamal, Khem Narayan Pokhrel

22

23

24

25

26

27

28

## 1   **References**

2

3   1.    Watt RG. Strategies and approaches in oral disease prevention and health promotion.

4        Bull World Heal Organ [Internet]. 2005;83(9):711–8. Available from:

5        <https://www.ncbi.nlm.nih.gov/pubmed/16211164>

6   2.    Moghaddam LF, Vianna Vettore M, Bayani A, Bayat A-H, Ahounbar E, Hemmat M,

7        et al. The Association of Oral Health Status, demographic characteristics and

8        socioeconomic determinants with Oral health-related quality of life among children: a

9        systematic review and Meta-analysis. Available from: <https://doi.org/10.1186/s12887->

10       020-02371-8

11   3.    Štefanová E, Baška T, Holubčíková J, Timková S, Tatarková M, Sovičová M, et al.

12        Selected Behavioural Factors Affecting Oral Health in Schoolchildren: Results from

13        the Health Behaviour in School-Aged Children (HBSC) Slovak Study. 2005 [cited

14        2021 Dec 29]; Available from: [www.mdpi.com/journal/ijerph](http://www.mdpi.com/journal/ijerph)

15   4.    Moghaddam LF, Vianna Vettore M, Bayani A, Bayat A-H, Ahounbar E, Hemmat M,

16        et al. The Association of Oral Health Status, demographic characteristics and

17        socioeconomic determinants with Oral health-related quality of life among children: a

18        systematic review and Meta-analysis. BMC Pediatr [Internet]. 2020 [cited 2021 Jun

19        26]; Available from: <https://doi.org/10.1186/s12887-020-02371-8>

20   5.    FDI. Annual Report 2017 | FDI World Dental Federation [Internet]. 2017 [cited 2021

21        Feb 13]. Available from: [https://www.fdiworlddental.org/resources/annual-](https://www.fdiworlddental.org/resources/annual-reports/annual-report-2017)

22        reports/annual-report-2017

23   6.    Shakya A, Shrestha M, Srivastav, A. A, Kayastha B. Oral health related

24        knowledge, attitude, and practice among school children of Jyamrung, Nepal ( Journal

25        of Chitwan Medical College, 4(9):1-4. 2014.

- 1 7. Haque SE, Rahman M, Itsuko K, Mutahara M, Kayako S, Tsutsumi A, et al. Effect of  
2 a school-based oral health education in preventing untreated dental caries and  
3 increasing knowledge, attitude, and practices among adolescents in Bangladesh. *BMC*  
4 *Oral Health* [Internet]. 2016;16:44. Available from:  
5 <https://www.ncbi.nlm.nih.gov/pubmed/27016080>
- 6 8. Nagarajappa R, Kakatkar G, Sharda AJ, Asawa K, Ramesh G, Sandesh N. Infant oral  
7 health: Knowledge, attitude and practices of parents in Udaipur, India. *Dent Res J*  
8 [Internet]. 2013;10(5):659–65. Available from:  
9 <https://www.ncbi.nlm.nih.gov/pubmed/24348626>
- 10 9. Paula JS, Leite ICG, Almeida AB, Ambrosano GMB, Pereira AC, Mialhe FL. The  
11 influence of oral health conditions, socioeconomic status and home environment  
12 factors on schoolchildren’s self-perception of quality of life. *Health Qual Life*  
13 *Outcomes* [Internet]. 2012 Jan 13 [cited 2021 Dec 29];10(1):1–8. Available from:  
14 <https://hqlo.biomedcentral.com/articles/10.1186/1477-7525-10-6>
- 15 10. Hu J, Jiang W, Lin X, Zhu H, Zhou N, Chen Y, et al. Dental caries status and caries  
16 risk factors in students ages 12–14 years in Zhejiang, China. *Med Sci Monit* [Internet].  
17 2018 [cited 2021 Jul 26];24:3670–8. Available from:  
18 <https://www.medscimonit.com/abstract/index/idArt/907325>
- 19 11. Abdelhamid N, Bahta H, Mohammed S, Dhanni C, Elfatih AM. Prevalence of Dental  
20 Caries and Evaluation of Mean DMFT Index among Secondary School Students in  
21 Asmara, Eritrea. *African J Oral Heal* [Internet]. 2019 Mar 15 [cited 2021 Dec  
22 29];8(2):1–7. Available from: <http://ajoh.oauife.edu.ng/index.php/ajoh/article/view/37>
- 23 12. Prasai Dixit L, Shakya A, Shrestha M, Shrestha A. Dental caries prevalence, oral  
24 health knowledge and practice among indigenous Chepang school children of Nepal.  
25 *BMC Oral Health* [Internet]. 2013 May 14 [cited 2021 Mar 2];13(1):20. Available



- 1 from: <https://bmcoralhealth.biomedcentral.com/articles/10.1186/1472-6831-13-20>
- 2 13. Gao J, Ruan J, Zhao L, Zhou H, Huang R TJ. Oral health status and oral health  
3 knowledge, attitudes and behavior among rural children in Shaanxi, western China: a  
4 cross-sectional survey. *BMC Oral Heal* 2014 Nov 29;14(144) doi 10.1186/1472-6831-  
5 14-144. 2014;
- 6 14. Jürgensen N, Petersen PE. Oral health and the impact of socio-behavioural factors in a  
7 cross sectional survey of 12-year old school children in Laos. *BMC Oral Health*  
8 [Internet]. 2009 Nov 16 [cited 2021 Dec 29];9(1):1–11. Available from:  
9 <https://bmcoralhealth.biomedcentral.com/articles/10.1186/1472-6831-9-29>
- 10 15. Lukacs JR. Gender differences in oral health in South Asia: Metadata imply  
11 multifactorial biological and cultural causes. *Am J Hum Biol* [Internet]. 2011 May 1  
12 [cited 2021 Dec 30];23(3):398–411. Available from:  
13 <https://onlinelibrary.wiley.com/doi/full/10.1002/ajhb.21164>
- 14 16. WHO. Finding the gaps in meeting adolescent health needs in Nepal. 2016;
- 15 17. Shyam R, Manjunath B, Kumar A, Narang R, Ghanghas M. Relationship of  
16 sociodemographic factors on dental caries experience among 11–14-year-old  
17 schoolchildren in India. *Indian J Dent Res* [Internet]. 2019 Nov 1 [cited 2021 Dec  
18 28];30(6):948. Available from: [https://www.ijdr.in/article.asp?issn=0970-  
19 9290;year=2019;volume=30;issue=6;spage=948;epage=953;aulast=Shyam](https://www.ijdr.in/article.asp?issn=0970-9290;year=2019;volume=30;issue=6;spage=948;epage=953;aulast=Shyam)
- 20 18. Veerasamy A, Kirk R, Gage J. Epidemiology of dental caries among adolescents in  
21 Tamil Nadu, India. *Int Dent J*. 2016 Jun 1;66(3):169–77.
- 22 19. Al-Darwish M, El Ansari W, Bener A. Prevalence of dental caries among 12–14 year  
23 old children in Qatar. *Saudi Dent J*. 2014 Jul 1;26(3):115–25.
- 24 20. Sofia Papadaki<sup>1</sup>, 2 GVAD, HaniBani<sup>1</sup> A, Jing Kang<sup>1</sup>. Gender Differences in Caries  
25 and Periodontal Status in UK Children. medRxiv Prepr doi

- 1            <https://doi.org/10.1101/2021032421253842>. 2021;
- 2    21.    Youssefi MA, Afroughi S. Prevalence and Associated Factors of Dental Caries in  
3            Primary Schoolchildren: An Iranian Setting. *Int J Dent*. 2020;2020.
- 4    22.    G. Lalithambigai AR, Rajesh1 G, Shenoy1 R, M. B. H. Pai1. Dental health behavior  
5            pertaining to fluoridated toothpaste usage among the parents of private and  
6            government school students in Mangalore, South India. *J Indian Assoc Public Heal*  
7            *Dent*. 2019;17(3).
- 8    23.    Obregón-Rodríguez1 N, Fernández-Riveiro2 P, Piñeiro-Lamas3 M, Smyth-Chamosa2  
9            E, And AM-M, M. M. Suárez-Cunqueiro1 4. Prevalence and caries-related risk factors  
10           in schoolchildren of 12- and 15-year-old: a cross-sectional study. *BMC Oral Health*.  
11           2019;
- 12   24.    Shitie A, Addis R, Tilahun A, Negash W. Prevalence of Dental Caries and Its  
13           Associated Factors among Primary School Children in Ethiopia. *Int J Dent*.  
14           2021;2021.
- 15
- 16

1 **Table 1 Basic characteristics of participants (n=669)**

2

| <b>Characteristics</b>              | <b>Total (n=669)</b> | <b>%</b> |
|-------------------------------------|----------------------|----------|
| <b>Gender</b>                       |                      |          |
| Male                                | 302                  | 45.1     |
| Female                              | 367                  | 54.9     |
| <b>Father's education</b>           |                      |          |
| Illiterate                          | 68                   | 10.2     |
| Literate and basic level            | 396                  | 59.2     |
| High school and above               | 205                  | 30.6     |
| <b>Mother's education</b>           |                      |          |
| Illiterate                          | 114                  | 17.1     |
| Literate and basic level            | 405                  | 60.5     |
| High school and above               | 150                  | 22.4     |
| <b>Father's occupation</b>          |                      |          |
| Employed                            | 303                  | 45.3     |
| Foreign employment                  | 158                  | 23.6     |
| Agriculture                         | 111                  | 16.6     |
| Business                            | 81                   | 12.1     |
| Unemployed                          | 16                   | 2.4      |
| <b>Mother's occupation</b>          |                      |          |
| Employed                            | 170                  | 25.4     |
| Foreign employment                  | 23                   | 3.4      |
| Agriculture                         | 220                  | 32.9     |
| Business                            | 105                  | 15.7     |
| Unemployed                          | 151                  | 22.6     |
| <b>Using health services or not</b> |                      |          |
| Yes                                 | 220                  | 32.9     |
| No                                  | 449                  | 67.1     |
| <b>Brushing aid</b>                 |                      |          |
| Datiwan/other                       | 4                    | 0.6      |
| Brush                               | 665                  | 99.4     |
| <b>Brushing material</b>            |                      |          |
| Powder/coila/others                 | 13                   | 1.9      |
| Toothpaste                          | 656                  | 98.1     |
| <b>Brush change</b>                 |                      |          |
| Every 1 month                       | 370                  | 55.3     |
| Every 3 month                       | 156                  | 23.3     |
| Every 6 month                       | 34                   | 5.1      |
| Bristle out of shape                | 109                  | 16.3     |
| <b>Brushing frequency</b>           |                      |          |
| Two times a day                     | 352                  | 52.6     |
| Once-daily                          | 260                  | 38.9     |
| More than 2 times a day             | 20                   | 3.0      |
| Occasionally                        | 37                   | 5.5      |
| <b>Brushing Time</b>                |                      |          |
| Less than 1 min                     | 155                  | 23.2     |
| 2-3 minutes                         | 330                  | 49.3     |

|                                                    |             |      |
|----------------------------------------------------|-------------|------|
| More than 3 minutes                                | 184         | 27.5 |
| <b>Paste type</b>                                  |             |      |
| Fluoridated                                        | 195         | 29.1 |
| Non fluoridated                                    | 30          | 4.5  |
| Don't know                                         | 444         | 66.4 |
| <b>Mouth gargle after a meal</b>                   |             |      |
| Never                                              | 37          | 5.5  |
| Sometimes                                          | 65          | 9.7  |
| Always                                             | 567         | 84.8 |
| <b>Tongue clean after the meal</b>                 |             |      |
| Never                                              | 132         | 19.7 |
| Sometimes                                          | 400         | 59.8 |
| Always                                             | 137         | 20.5 |
| <b>Decay status</b>                                |             |      |
| Non-decayed                                        | 272         | 40.7 |
| Decayed                                            | 397         | 59.3 |
| <b>Filled status</b>                               |             |      |
| filled                                             | 20          | 3.0  |
| not filled                                         | 649         | 97.0 |
| <b>Oral health knowledge score (Total score=9)</b> |             |      |
| Mean (SD)                                          | 7.06 (1.46) |      |
| <b>DMFT score Mean (SD)</b>                        |             |      |
| Very low (0.0-1.1)                                 | 1.82 (1.07) |      |
| Low (1.2-2.6)                                      | 367 (54.9)  |      |
| Moderate (2.7-4.4)                                 | 118 (17.6)  |      |
| High (4.5-6.5)                                     | 134 (20.0)  |      |
| Very high (6.6<)                                   | 33 (4.9)    |      |
|                                                    | 17 (2.6)    |      |

---

**Table 2. Total Knowledge score, DMFT score and Decayed score, by sociodemographic factors**

| <b>Characteristics</b>      | <b>Total Knowledge score (Mean, SD)</b> | <b>p-value</b> | <b>Total DMFT score (Mean, SD)</b> | <b>p-value</b> | <b>Total Decayed score (Mean, SD)</b> | <b>p-value</b> |
|-----------------------------|-----------------------------------------|----------------|------------------------------------|----------------|---------------------------------------|----------------|
| <b>Gender</b>               |                                         |                |                                    |                |                                       |                |
| Male                        | 6.86 (1.62)                             |                | 1.47 (1.78)                        |                | 1.24 (1.53)                           |                |
| Female                      | 7.25 (1.27)                             | <0.001         | 1.90 (1.95)                        | 0.003          | 1.62 (1.75)                           | 0.003          |
| <b>Father's education</b>   |                                         |                |                                    |                |                                       |                |
| Illiterate and no schooling | 6.62(1.95)                              | 0.016          | 1.63 (1.88)                        | 0.927          | 1.46(1.72)                            | 0.866          |
| Literate and Basic          | 7.06 (1.42)                             |                | 1.72 (1.87)                        |                | 1.47(1.68)                            |                |
| High school and above       | 7.20 (1.30)                             |                | 1.69(1.94)                         |                | 1.40(1.64)                            |                |
| <b>Mother's education</b>   |                                         |                |                                    |                |                                       |                |
| Illiterate and no schooling | 6.96(1.72)                              | 0.601          | 1.87(2.13)                         | 0.596          | 1.55(1.81)                            | 0.760          |
| Literate and Basic          | 7.05(1.47)                              |                | 1.68(1.86)                         |                | 1.43(1.64)                            |                |
| High school and above       | 7.15(1.16)                              |                | 1.65(1.77)                         |                | 1.42(1.62)                            |                |
| <b>Father's occupation</b>  |                                         |                |                                    |                |                                       |                |
| Employed                    | 7.09(1.51)                              | 0.960          | 1.71(1.85)                         | 0.973          | 1.48(1.67)                            | 0.960          |
| Foreign employed            | 7.06(1.40)                              |                | 1.66(1.92)                         |                | 1.42(1.75)                            |                |
| Business                    | 7.07(1.42)                              |                | 1.75(2.07)                         |                | 1.49(1.68)                            |                |
| Agriculture/other           | 7.05(1.39)                              |                | 1.75(1.91)                         |                | 1.38(1.62)                            |                |
| Un-employed                 | 6.56(1.54)                              |                | 1.44(1.26)                         |                | 1.25(1.06)                            |                |
| <b>Mother's occupation</b>  |                                         |                |                                    |                |                                       |                |
| Employed                    | 7.06(1.42)                              | 0.164          | 1.52(1.74)                         | 0.635          | 1.32(1.63)                            | 0.753          |
| Foreign employed            | 6.52(1.99)                              |                | 1.87(2.16)                         |                | 1.65(2.10)                            |                |
| Business                    | 7.01(1.49)                              |                | 1.81(2.11)                         |                | 1.51(1.76)                            |                |
| Agriculture/other           | 7.21(1.34)                              |                | 1.72(1.81)                         |                | 1.44(1.57)                            |                |
| Un-employed                 | 6.95(1.52)                              |                | 1.80(1.97)                         |                | 1.53(1.73)                            |                |
| <b>Dental Checkup done</b>  |                                         |                |                                    |                |                                       |                |
| Yes                         | 7.25(1.22)                              | 0.018          | 1.99 (1.99)                        | 0.007          | 1.59(1.65)                            | 0.119          |
| No                          | 6.97(1.55)                              |                | 1.57 (1.82)                        |                | 1.38(1.67)                            |                |

**Table 3 Knowledge on oral health affecting DMFT score and Decayed score (P-value by ANOVA)**

| <b>Variables</b>                       | <b>Total DMFT score<br/>Mean (SD)</b> | <b>P-value</b> | <b>Total Decayed score<br/>Mean (SD )</b> | <b>P-value</b> |
|----------------------------------------|---------------------------------------|----------------|-------------------------------------------|----------------|
| <b>Regular brushing prevents Decay</b> |                                       |                |                                           |                |
| Yes                                    | 1.69 (1.89)                           | 0.187          | 1.44 (1.67)                               | 0.178          |
| No                                     | 1.22(1.35)                            |                | 0.94(1.16)                                |                |
| Don't know                             | 2.10 (1.99)                           |                | 1.77(1.71)                                |                |
| <b>Fizzy drinks affect teeth</b>       |                                       |                |                                           |                |
| Yes                                    | 1.67(1.79)                            | 0.452          | 1.41(1.58)                                | 0.439          |
| No                                     | 1.96(2.23)                            |                | 1.68(1.84)                                |                |
| Don't know                             | 1.68(1.97)                            |                | 1.44(1.81)                                |                |
| <b>Fluoride prevent Decay</b>          |                                       |                |                                           |                |
| Yes                                    | 1.53(1.94)                            | 0.142          | 1.21(1.54)                                | 0.029          |
| No                                     | 2.33(2.20)                            |                | 2.13(2.13)                                |                |
| Don't know                             | 1.73(1.85)                            |                | 1.48(1.67)                                |                |
| <b>Gum disease causes gum bleed</b>    |                                       |                |                                           |                |
| Yes                                    | 1.71(1.92)                            | 0.960          | 1.45(1.67)                                | 0.996          |
| No                                     | 1.61(1.64)                            |                | 1.43(1.53)                                |                |
| Don't know                             | 1.69(1.79)                            |                | 1.44(1.69)                                |                |
| <b>Gum disease affect teeth</b>        |                                       |                |                                           |                |
| Yes                                    | 1.65(1.85)                            | 0.055          | 1.37(1.59)                                | 0.015          |
| No                                     | 2.60(2.16)                            |                | 2.30(2.02)                                |                |
| Don't know                             | 1.88(2.01)                            |                | 1.70(1.94)                                |                |
| <b>Proper brushing prevent decay</b>   |                                       |                |                                           |                |
| Yes                                    | 1.70(1.88)                            | 0.823          | 1.45(1.67)                                | 0.976          |
| No                                     | 2.14(1.57)                            |                | 1.57(1.51)                                |                |
| Don't know                             | 1.73(2.10)                            |                | 1.42(1.75)                                |                |
| <b>Sugar destroys teeth</b>            |                                       |                |                                           |                |
| Yes                                    | 1.70(1.87)                            | 0.953          | 1.44(1.64)                                | 0.964          |
| No                                     | 1.83(2.55)                            |                | 1.43(2.25)                                |                |
| Don't know                             | 1.70(1.82)                            |                | 1.51(1.69)                                |                |

|                                                  |            |       |  |            |       |
|--------------------------------------------------|------------|-------|--|------------|-------|
| <b>Decay destroys teeth</b>                      |            |       |  |            |       |
| Yes                                              | 1.70(1.88) | 0.801 |  | 1.45(1.66) | 0.964 |
| No                                               | 1.29(2.98) |       |  | 1.29(2.98) |       |
| Don't know                                       | 1.81(1.80) |       |  | 1.47(1.46) |       |
| <b>Healthy teeth mean strong and caries free</b> |            |       |  |            |       |
| Yes                                              | 1.68(1.88) | 0.487 |  | 1.44(1.68) | 0.960 |
| No                                               | 1.86(1.51) |       |  | 1.57(1.50) |       |
| Don't know                                       | 2.02(2.09) |       |  | 1.45(1.63) |       |

**Table 4 Practice on oral health on total knowledge score, DMFT score and Decayed score (P-value by ANOVA)**

| Characteristics           | Total knowledge score Mean (SD) | P-value | Total DMFT score Mean (SD) | P-value | Decayed score Mean (SD) | P-value |
|---------------------------|---------------------------------|---------|----------------------------|---------|-------------------------|---------|
| <b>Brushing frequency</b> |                                 |         |                            |         |                         |         |
| Sometimes                 | 6.76(2.00)                      | 0.027   | 1.68(1.81)                 |         | 1.46(1.74)              | 0.694   |
| Once-daily                | 6.90(1.48)                      |         | 1.58 (1.84)                |         | 1.36(1.65)              |         |
| Two times a day           | 7.22(1.34)                      |         | 1.80 (1.95)                | 0.549   | 1.52(1.70)              |         |
| More than 2 times a day   | 6.90(1.65)                      |         | 1.75 (1.58)                |         | 1.30(1.34)              |         |
| <b>Brushing Time</b>      |                                 |         |                            |         |                         |         |
| Less than 1 min           | 7.17(1.38)                      | 0.150   | 1.86(2.16)                 |         | 1.51(1.75)              | 0.582   |
| 2-3 minutes               | 7.11(1.45)                      |         | 1.63(1.77)                 | 0.455   | 1.38(1.60)              |         |
| More than 3 minutes       | 6.89(1.52)                      |         | 1.72 (1.85)                |         | 1.52(1.71)              |         |
| <b>Brushing aid</b>       |                                 |         |                            |         |                         |         |
| Datiwan/other             | 6.50(0.57)                      | 0.442   | 2.75(3.77)                 | 0.269   | 2.75(3.77)              | 0.118   |
| Brush                     | 7.06(1.46)                      |         | 1.70(1.88)                 |         | 1.44(1.65)              |         |
| <b>Brushing material</b>  |                                 |         |                            |         |                         |         |
| Powder/coal/others        | 6.46(1.56)                      | 0.135   | 1.69(1.88)                 | 0.980   | 1.08(1.65)              | 0.421   |
| Toothpaste                | 7.07(1.45)                      |         | 1.71(1.89)                 |         | 1.45(1.67)              |         |
| <b>Brush change</b>       |                                 |         |                            |         |                         |         |
| Every 1 month             | 7.04(1.54)                      |         | 1.70(1.92)                 | 0.770   | 1.46(1.73)              | 0.797   |

|                      |            |        |            |       |             |       |
|----------------------|------------|--------|------------|-------|-------------|-------|
| Every 3 month        | 7.04(1.42) | 0.868  | 1.72(1.88) |       | 1.47(1.60)  |       |
| Every 6 month        | 7.21(1.32) |        | 2.00(1.98) |       | 1.59 (1.45) |       |
| Bristle out of shape | 7.13(1.23) |        | 1.61(1.77) |       | 1.31(1.61)  |       |
| <b>Paste type</b>    |            |        |            |       |             |       |
| Non fluoridated      | 7.03(1.62) | <0.001 | 1.73(2.19) | 0.552 | 1.71(1.51)  | 0.298 |
| Don't know           | 6.83(1.44) |        | 1.76(1.91) |       | 1.51(1.72)  |       |
| Fluoridated          | 7.58(1.32) |        | 1.58(1.79) |       | 1.34(1.57)  |       |
| <b>Mouth gargle</b>  |            |        |            |       |             |       |
| Never                | 6.27(2.07) | 0.002  | 2.03(2.12) | 0.254 | 1.78(2.08)  | 0.445 |
| Sometimes            | 6.94(1.45) |        | 1.97(1.93) |       | 1.46(1.54)  |       |
| Always               | 7.13(1.39) |        | 1.65(1.87) |       | 1.42(1.65)  |       |
| <b>Tongue clean</b>  |            |        |            |       |             |       |
| Never                | 6.57(1.53) | 0.009  | 1.89(1.88) | 0.471 | 1.67(1.71)  | 0.215 |
| Sometimes            | 6.99(1.49) |        | 1.65(1.80) |       | 1.45(1.71)  |       |
| Always               | 7.19(1.40) |        | 1.67(1.92) |       | 1.37(1.64)  |       |



1 **Table 5 Multiple Regression Analysis: Association of socio-economic characteristics,**  
 2 **knowledge and practices with total DMFT**

| Characteristics                                    | $\beta$ -<br>coefficient <sup>1</sup> | 95% Confidence Interval for $\beta$ |             | P-value |
|----------------------------------------------------|---------------------------------------|-------------------------------------|-------------|---------|
|                                                    |                                       | Lower Bound                         | Upper Bound |         |
| <b>Gender (female)</b>                             | 0.43                                  | 0.13                                | 0.73        | 0.005   |
| <b>Education level of father (below secondary)</b> | 0.08                                  | -0.08                               | 0.24        | 0.302   |
| <b>Education level of mother (below secondary)</b> | -0.07                                 | -0.23                               | 0.09        | 0.385   |
| <b>Occupation of father (Unemployed)</b>           | -0.03                                 | -0.14                               | 0.09        | 0.634   |
| <b>Occupation of mother (Unemployed)</b>           | 0.06                                  | -0.03                               | 0.16        | 0.206   |
| <b>Previous Exposure to OHE (no)</b>               | 0.19                                  | -0.12                               | 0.50        | 0.232   |
| <b>Total knowledge score</b>                       | -0.09                                 | -0.20                               | -0.10       | 0.047   |
| <b>Availability of water (no)</b>                  | 0.02                                  | -0.70                               | 0.74        | 0.962   |
| <b>Regular brushing habit (no)</b>                 | 0.12                                  | -0.15                               | 0.39        | 0.37    |
| <b>Mouth gargle after meal (no)</b>                | -0.22                                 | -0.51                               | 0.08        | 0.147   |
| <b>Tongue cleaning after meal (no)</b>             | -0.10                                 | -0.30                               | 0.09        | 0.291   |

3 <sup>1</sup>Adjusted for of gender, education level of father, education level of mother, occupation of  
 4 father, occupation of mother, previous exposure to oral health education, knowledge score,  
 5 availability of water, regular brushing habit, mouth gargle after meal, and tongue cleaning  
 6 after meal.

7
